# Supplementary material for: Thermodynamic Studies of the Micellar Properties of a Surfactant Used for Membrane Protein Solubilization and Stabilization
Source: MDPI journal article supplement (doi:10.3390/su15086618), 2023-04-13

## Supplementary material

### THERMODYNAMIC STUDIES OF THE MICELLAR PROPERTIES OF THE SURFACTANT USED FOR THE MEMBRANE PROTEINS SOLUBILIZATION AND STABILIZATION

JOANNA KRAWCZYK

Department of Interfacial Phenomena, Institute of Chemical Sciences, Faculty of Chemistry, Maria Curie-Skłodowska University in Lublin, Maria Curie-Skłodowska Sq. 3, 20-031 Lublin, Poland

\*Correspondence: whom correspondence should be addressed, phone:(48-81) 537-56-03, fax: (48-81) 533-3348, e-mail: j.krawczyk@poczta.umcs.lublin.pl

**Figure S1** A plot of the pyrene  $I_3 / I_1$  ratio vs. the logarithm of OTG concentration ( $\log C$ ) at 293 K, 303 K and 313 K.

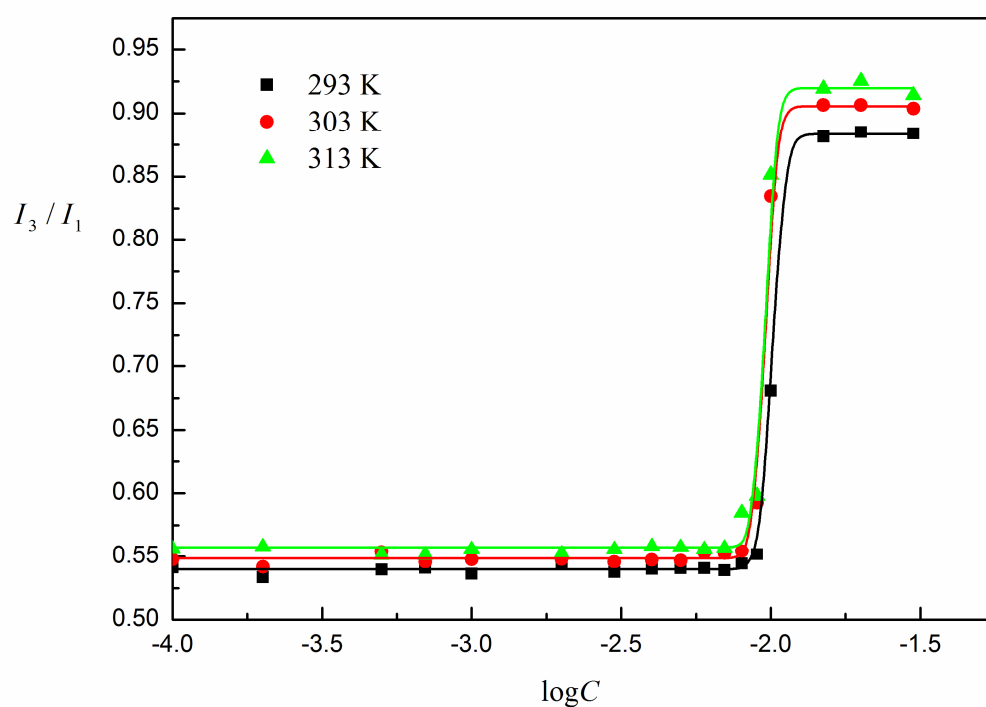

**Figure S2** A plot of the kinematic viscosity ( $\eta_k$ ) of aqueous solutions of OTG vs. the logarithm of its concentration ( $\log C$ ) at 293, 303 and 313 K.

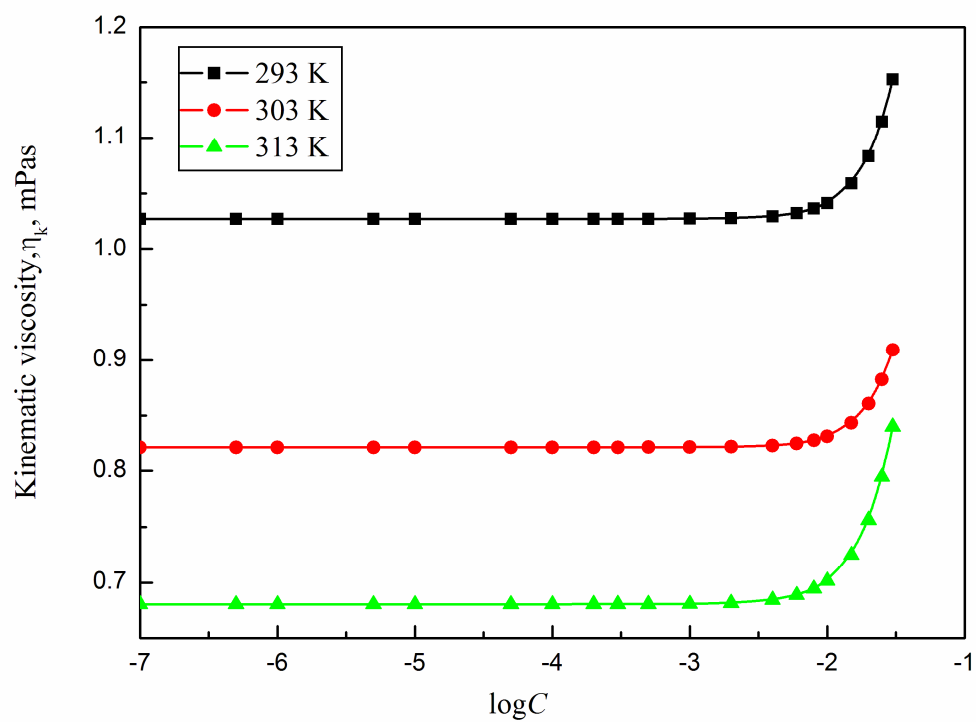

**Figure S3** A plot of the partial molar volume ( $\bar{V}_M$ ) of OTG vs. the logarithm of its concentration ( $\log C$ ) at 303 K determined from the linear (curve 1) and polynomial of second order (curve 2) equations expressing the dependence between the density ( $\rho$ ) and the percentage weight of the solute ( $C_p$ ) of the studied surfactant, respectively.

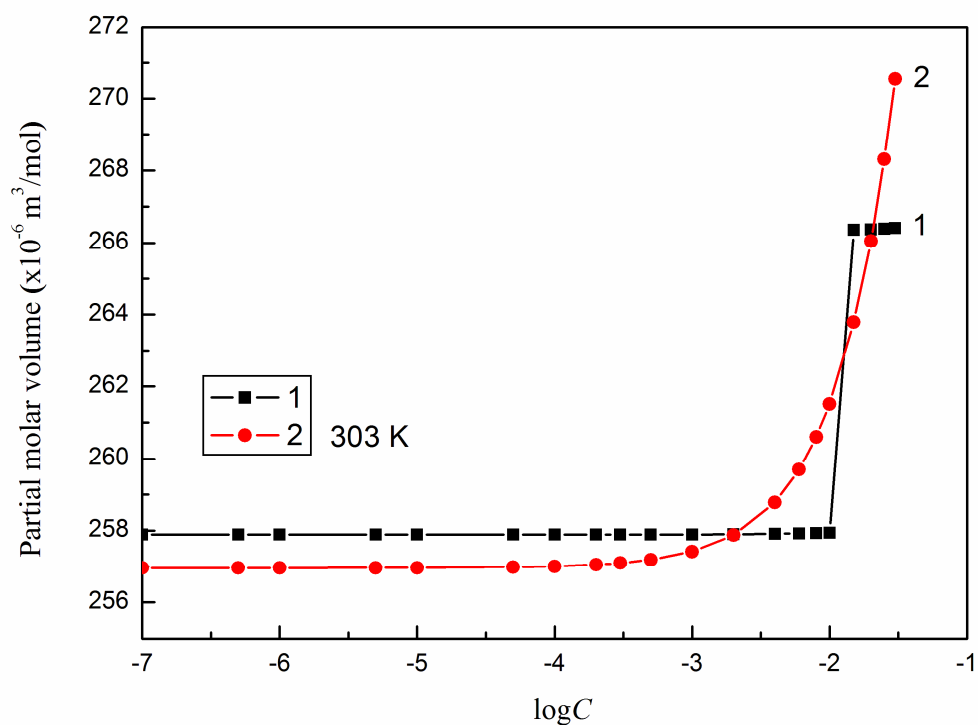

**Figure S4** A plot of the partial molar volume ( $\bar{V}_M$ ) of OTG vs. the logarithm of its concentration ( $\log C$ ) at 313 K determined from the linear (curve 1) and polynomial of second order (curve 2) equations expressing the dependence between the density ( $\rho$ ) and the percentage weight of the solute ( $C_p$ ) of the studied surfactant, respectively.

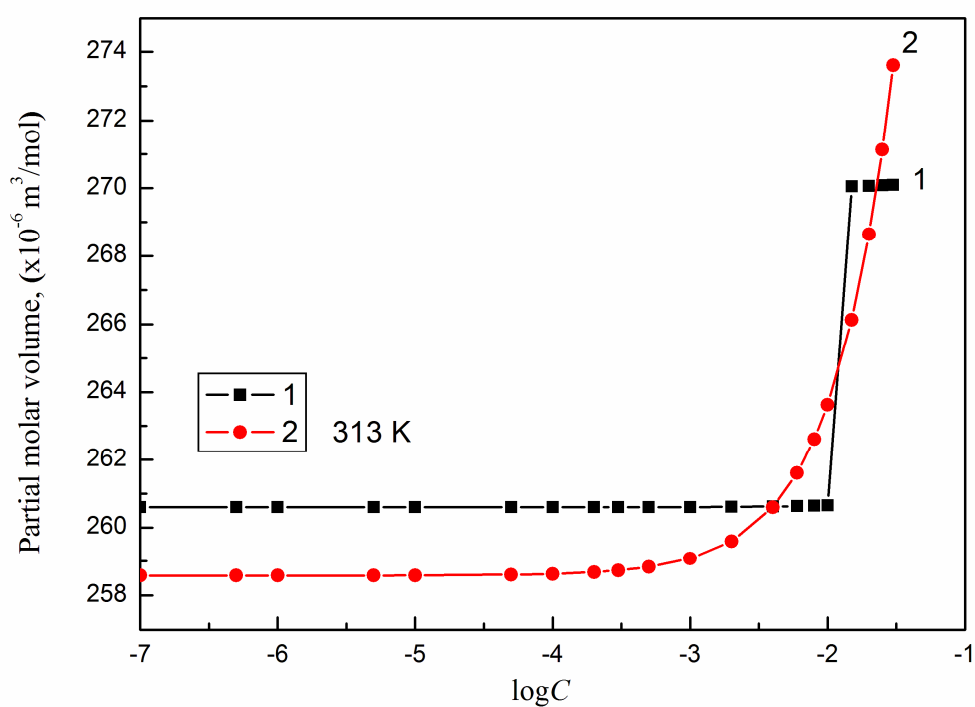

Supplement: s1 [file s1]
